# Supplementary material
Source: publisher figshare collection journal article supplement (https://acs.figshare.com/ndownloader/files/3825097)
Supplement: Supplementary file 1 [file 3825097]

**Supporting Information for:**

**Capturing the Long-Sought Small-Bandgap Endohedral Fullerene**

**Sc<sub>3</sub>N@C<sub>82</sub> with Low Kinetic Stability**

**Tao Wei,<sup>a</sup> Song Wang,<sup>a</sup> Fupin Liu,<sup>a</sup> Yanzhi Tan,<sup>b</sup> Xianjun Zhu,<sup>a</sup> Suyuan Xie,<sup>b</sup>  
and Shangfeng Yang<sup>\*a</sup>**

<sup>a</sup> Hefei National Laboratory for Physical Sciences at Microscale, CAS Key Laboratory of Materials for Energy Conversion, Department of Materials Science and Engineering, Synergetic Innovation Center of Quantum Information & Quantum Physics, University of Science and Technology of China (USTC), Hefei 230026, China

<sup>b</sup> State Key Laboratory of Physical Chemistry of Solid Surfaces and Department of Chemistry, College of Chemistry and Chemical Engineering, Xiamen University, Xiamen 361005, China

**Content**

|                                                                                                                |             |
|----------------------------------------------------------------------------------------------------------------|-------------|
| <b>S1. Isolation of Sc<sub>3</sub>N@C<sub>82</sub></b>                                                         | <b>[S2]</b> |
| <b>S2. Estimation of the relative yield of Sc<sub>3</sub>N@C<sub>82</sub></b>                                  | <b>[S3]</b> |
| <b>S3. X-ray crystallographic data of Sc<sub>3</sub>N@C<sub>82</sub>-C<sub>2v</sub>(39718)</b>                 | <b>[S4]</b> |
| <b>S4. UV-vis-NIR spectrum of Sc<sub>3</sub>N@C<sub>82</sub> in CS<sub>2</sub> solution</b>                    | <b>[S6]</b> |
| <b>S5. Thermal stability of Sc<sub>3</sub>N@C<sub>82</sub> vs Sc<sub>3</sub>N@C<sub>80</sub>-I<sub>h</sub></b> | <b>[S7]</b> |
| <b>S6. Cyclic voltammograms of Sc<sub>3</sub>N@C<sub>82</sub> in different scanning regions</b>                | <b>[S7]</b> |

## S1. Isolation of $\text{Sc}_3\text{N@C}_{82}$ .

$\text{Sc}_3\text{N@C}_{82}$  was synthesized in a modified Krätschmer-Huffman generator by vaporizing composite graphite rods ( $\Phi 8 \times 150$  mm) containing a mixture of  $\text{Sc}_2\text{O}_3$  (99.99%) and graphite powder with a molar ratio of 1:15 (Sc:C) with the addition of 10 mbar  $\text{N}_2$  into 400 mbar He. The as-produced soot was Soxhlet-extracted by  $\text{CS}_2$  for 24 h, and the resulting brown-yellow solution was distilled to remove  $\text{CS}_2$  and then immediately redissolved in toluene (~200 ml) and subsequently passed through a 0.2  $\mu\text{m}$  Teflon filter (Sartorius AG, Germany) for HPLC isolation.  $\text{Sc}_3\text{N@C}_{82}$  was isolated by three-step HPLC as illustrated in Fig. S1. In the first step, the fullerene extract mixture was isolated by  $20 \times 250$  mm Buckyprep column, and fraction **A** with retention time ranging from 47.5 to 52.3 min was collected (see Fig. S1(a)). In the second-step isolation, the collected fraction **A** was subjected to the recycling HPLC isolation running in a  $10 \times 250$  mm Buckyprep-M column, and fraction **A-1** was collected after two cycles (see Fig. S1(b)). In the third step, fraction **A-1** was further isolated by recycling HPLC using  $10 \times 250$  mm Buckyprep column, resulting in isolation of fraction **A-1-1**, which was further checked by LD-TOF MS measurement as shown in Figure S2.

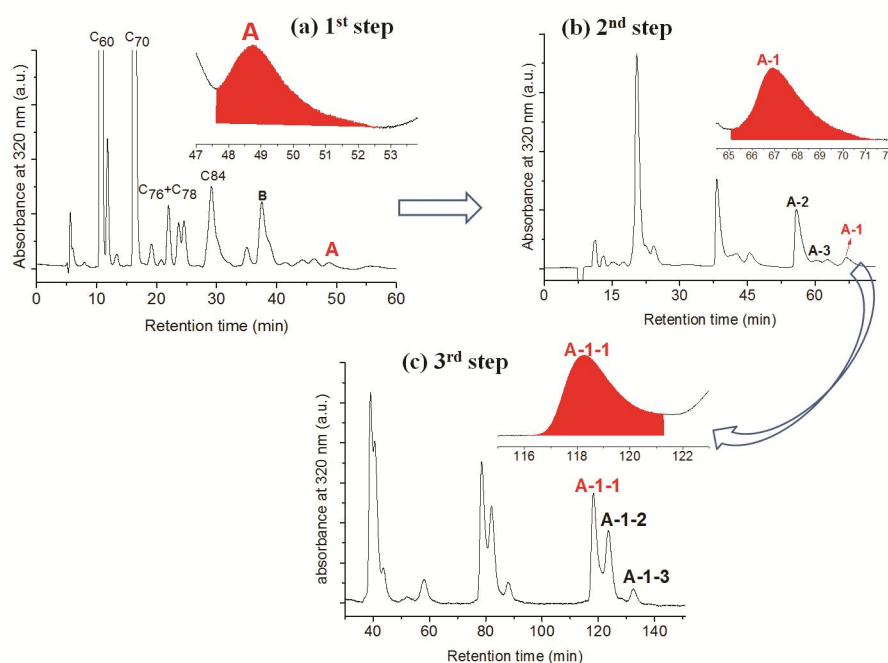

**Figure S1.** Isolation scheme of  $\text{Sc}_3\text{N@C}_{82}$ . (a) Chromatogram of the fullerene extract mixture obtained from  $\text{Sc}_2\text{O}_3$  with addition of  $\text{N}_2$ . ( $20 \times 250$  mm Buckyprep column; flow rate:  $15 \text{ mL}\cdot\text{min}^{-1}$ ; injection volume: 15 mL; toluene as eluent;  $40^\circ\text{C}$ .) (b) Recycling HPLC chromatogram of fractions **A** isolated from the  $\text{Sc}_2\text{O}_3/\text{N}_2$  extract ( $10 \times 250$  mm Buckyprep-M column; flow rate 5.0 ml/min; injection volume 5 ml; toluene as eluent;  $40^\circ\text{C}$ .) (c) Recycling HPLC chromatogram of fraction **A-1** ( $10 \times 250$  mm Buckyprep column; flow rate 5.0 ml/min; injection volume 5 ml; toluene as eluent;  $40^\circ\text{C}$ ). Inset: Enlarged chromatogram regions highlighting the fractions to be collected for next-step isolation. **A-1-1**:  $\text{Sc}_3\text{N@C}_{82}$ ; **A-1-2**:  $\text{Sc}_3\text{CN@C}_{80}$ ; **A-1-3**:  $\text{Sc}_3\text{CNC}_{82}$ ; **A-2**:  $\text{C}_{92}$ ; **A-3**:  $\text{Sc}_2\text{@C}_{86}$ ; **B**:  $\text{Sc}_3\text{N@C}_{80}$  (I) +  $\text{Sc}_3\text{N@C}_{80}$  (II) +  $\text{C}_{86}$ .

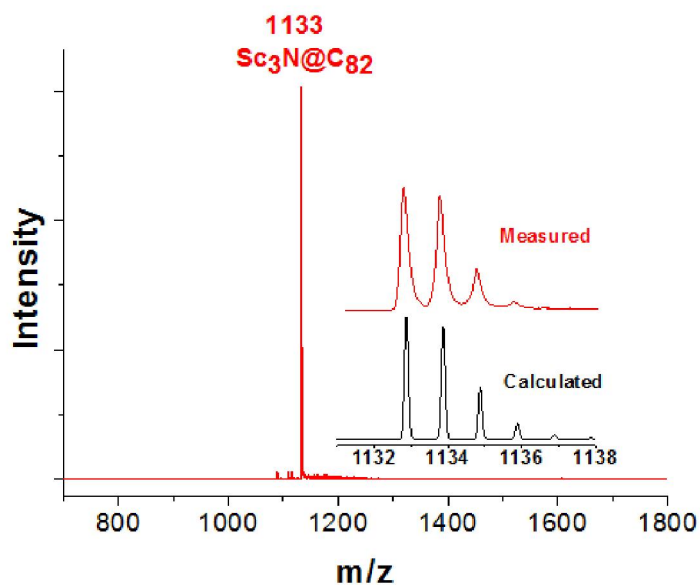

**Figure S2.** Postive-ion laser desorption time-of-flight (LD-TOF) mass spectrum of the isolated  $\text{Sc}_3\text{N@C}_{82}$  (Fraction **A-1-1**). Insets: measured and calculated isotopic distributions of  $\text{Sc}_3\text{N@C}_{82}$ .

### ***S2. Estimation of the relative yield of $\text{Sc}_3\text{N@C}_{82}$ to $\text{Sc}_3\text{N@C}_{80}$ ( $I_h$ ) and $\text{Sc}_3\text{N@C}_{70}$ .***

The relative yield of  $\text{Sc}_3\text{N@C}_{82}$  to  $\text{Sc}_3\text{N@C}_{80}$ - $I_h$  and  $\text{Sc}_3\text{N@C}_{70}$  is estimated based on the integration area of the corresponding peaks in the chromatograms shown in Fig. S1.

**Table S1.** Assignments of each (sub)fraction and their relative abundance.

| Fraction   | Sub-fraction         | Major component                                              | Relative abundance |
|------------|----------------------|--------------------------------------------------------------|--------------------|
| <b>B</b>   | -                    | $\text{Sc}_3\text{N@C}_{80}$ - $I_h$                         | 79.1%              |
|            |                      | $\text{Sc}_3\text{N@C}_{80}$ - $D_{5h}$                      | 13.2%              |
|            |                      | $\text{C}_{86}$                                              | 7.7%               |
| <b>A</b>   | <b>A-1</b>           | $\text{Sc}_3\text{N@C}_{82}$ , $\text{Sc}_3\text{CN@C}_{80}$ | 8.4%               |
|            | <b>A-2 + A-3</b>     | $\text{C}_{92}$ + $\text{Sc}_2\text{C}_{86}$                 | 91.6%              |
| <b>A-1</b> | <b>A-1-1</b>         | $\text{Sc}_3\text{N@C}_{82}$                                 | 48.6%              |
|            | <b>A-1-2 + A-1-3</b> | $\text{Sc}_3\text{CN@C}_{80}$ , $\text{Sc}_3\text{CNC}_{82}$ | 51.4%              |

(1) Given that relative yield of fraction **A:B** is 12.1%:1, the relative yield of Sc<sub>3</sub>N@C<sub>82</sub> to Sc<sub>3</sub>N@C<sub>80-I<sub>h</sub></sub> can be calculated as:

$$\text{Sc}_3\text{N}@C_{82}/\text{Sc}_3\text{N}@C_{80-I_h} = 48.6\% \times 8.4\% \times 12.1\% / 79.1\% \approx 0.62\%$$

(2) In our previous work, the relative yield of Sc<sub>3</sub>N@C<sub>68</sub> to Sc<sub>3</sub>N@C<sub>80-I<sub>h</sub></sub> and Sc<sub>3</sub>N@C<sub>70</sub> to Sc<sub>3</sub>N@C<sub>68</sub> was calculated to be 1:10 and 1.8%:1, respectively.<sup>[S1]</sup> Thus, the relative yield of Sc<sub>3</sub>N@C<sub>82</sub> relative to Sc<sub>3</sub>N@C<sub>70</sub> can be calculated as:

$$\text{Sc}_3\text{N}@C_{70}/\text{Sc}_3\text{N}@C_{80-I_h} = 1.8\% \div 10 = 0.18\%$$

$$\text{Sc}_3\text{N}@C_{82}/\text{Sc}_3\text{N}@C_{70} = 0.62\% / 0.18\% \approx 3.4:1$$

### S3. X-ray crystallographic data of Sc<sub>3</sub>N@C<sub>82</sub>-C<sub>2v</sub>(39718).

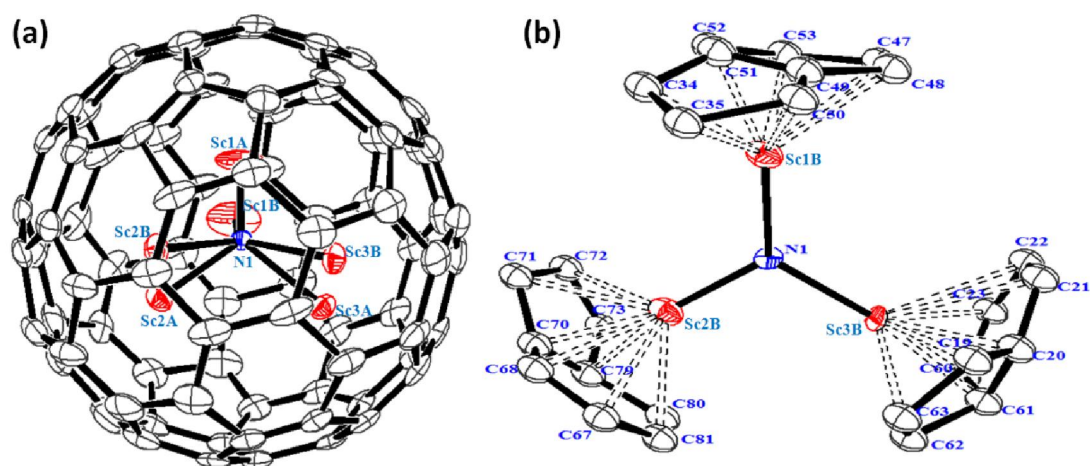

**Figure S3.** (a) Drawing showing the relative position of two Sc<sub>3</sub>N sites inside the C<sub>82</sub>-C<sub>2v</sub>(39718) cage, including the major one composed of Sc1A-Sc3A and the minor one consisting of Sc1B-Sc3B. All atoms are shown in 30% thermal ellipsoids. (b) Position of the minor Sc<sub>3</sub>N site with respect to the nearest carbon atoms of C<sub>2v</sub>(39718)-C<sub>82</sub> cage. C, N and Sc atoms are shown in gray, blue and red, respectively.

**Table S2.** Crystal and structure data of Sc<sub>3</sub>N@C<sub>82</sub>-C<sub>2v</sub>(39718) at 100 K.

|                                 |                                                                                       |                                   |                                             |
|---------------------------------|---------------------------------------------------------------------------------------|-----------------------------------|---------------------------------------------|
| Temperature                     | T = 100 K                                                                             | Crystal size                      | 0.1 × 0.08 × 0.06 mm <sup>3</sup>           |
| Empirical formula               | C131 H56 N5 Ni Sc3                                                                    | Reflections collected             | 7517                                        |
| Formula weight                  | 1890.40                                                                               | Independent reflections           | 6807[R(int) = 0.0374]                       |
| Wavelength                      | 1.54178                                                                               | Completeness to $\theta$          | 98.7% ( $\theta = 70.79$ )                  |
| Space group                     | C 2/m                                                                                 | Absorption correction             | Numerical                                   |
| Unit cell dimensions            | a = 25.2209(5) Å<br>b = 15.1985(3) Å<br>c = 19.9181(4) Å<br>$\beta = 94.772(2)^\circ$ | Max. and min. transmission        | 0.71272 and 1.00000                         |
| Volume                          | 7608.5(3) Å <sup>3</sup>                                                              | Refinement method                 | Full-matrix least-squares on F <sup>2</sup> |
| Z                               | 4                                                                                     | Data/restraints/parameters        | 7517/1075/1034                              |
| Density                         | 1.650 g/cm <sup>3</sup>                                                               | Goodness-of-fit on F <sup>2</sup> | 0.937                                       |
| Absorption coefficient          | 3.045                                                                                 | Final R indices [I > 2 $\sigma$ ] | R1 = 0.0721, wR2 = 0.1983                   |
| F(0000)                         | 3866                                                                                  | R indices (all data)              | R1 = 0.0769, wR2 = 0.2034                   |
| Theta range for data collection | 3.971 to 70.310 °                                                                     | Largest diff. peak hole           | 0.657 and -1.058 e/Å <sup>3</sup>           |
| Index ranges                    | -23 ≤ h ≤ 30<br>-18 ≤ k ≤ 18<br>-24 ≤ l ≤ 23                                          |                                   |                                             |

**S4. UV-vis-NIR spectrum of  $\text{Sc}_3\text{N}@C_{82}$  in  $\text{CS}_2$  solution.**

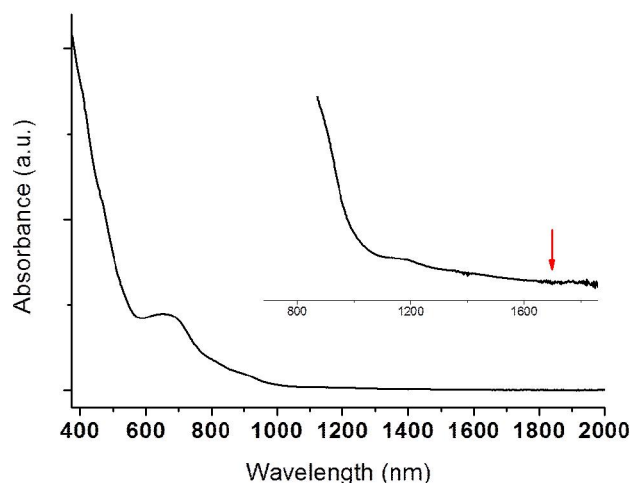

**Figure S4.** UV-Vis-NIR absorption spectrum of  $\text{Sc}_3\text{N}@C_{82}\text{-C}_{2v}(39718)$  dissolved in carbon disulfide. Inset: enlarged spectral range of 680-1860 nm and the red arrow indicated the absorption onset at 1696 nm.

**Table S3.** Characteristic electronic absorption data and optical bandgap ( $E_{g, \text{optical}}$ ) of  $\text{Sc}_3\text{N}@C_{2n}$  ( $2n=68, 70, 78, 80, 82$ ) NCFs.

| NCF                                                 | Absorption peaks (nm)                                 | Absorption onset ( $\lambda_{\text{onset}}$ , nm) | $E_{g, \text{optical}}$ (eV) <sup>a</sup> | Ref.      |
|-----------------------------------------------------|-------------------------------------------------------|---------------------------------------------------|-------------------------------------------|-----------|
| $\text{Sc}_3\text{N}@C_{68}\text{-D}_3(6140)$       | 419, 452, 560, 600, 627, 659, 673, 729, 785, 824, 998 | 1200                                              | 1.10                                      | S2        |
| $\text{Sc}_3\text{N}@C_{70}\text{-C}_{2v}(7854)$    | 468, 558, 696, 807, 894                               | 960                                               | 1.30                                      | S1        |
| $\text{Sc}_3\text{N}@C_{78}\text{-D}_{3h}(5)$       | 460, 623                                              | 1240                                              | 1.0                                       | S3        |
| $\text{Sc}_3\text{N}@C_{80}\text{-I}_h(7)$          | 424, 735                                              | 820                                               | 1.51                                      | S4        |
| $\text{Sc}_3\text{N}@C_{80}\text{-D}_{5h}(6)$       | 413, 472                                              | 950                                               | 1.30                                      | S4        |
| $\text{Sc}_3\text{N}@C_{82}\text{-C}_{2v}(39718)^b$ | 341, 465, 642, 908                                    | 1696                                              | 0.73                                      | This work |

<sup>a</sup> $E_{g, \text{optical}}$  (eV) =  $1240/\lambda_{\text{onset}}$  (nm). <sup>b</sup> $C_{82}\text{-C}_{2v}(39718)$  can be also labeled as  $C_{82}\text{-C}_{2v}(9)$  according to the conventional numbering of the isolated pentagon rule (IPR) isomers based on the Fowler-Monolopoulos spiral algorithm.<sup>S5</sup>

### S5. Thermal stability of $\text{Sc}_3\text{N}@C_{82}$ vs $\text{Sc}_3\text{N}@C_{80-I_h}$

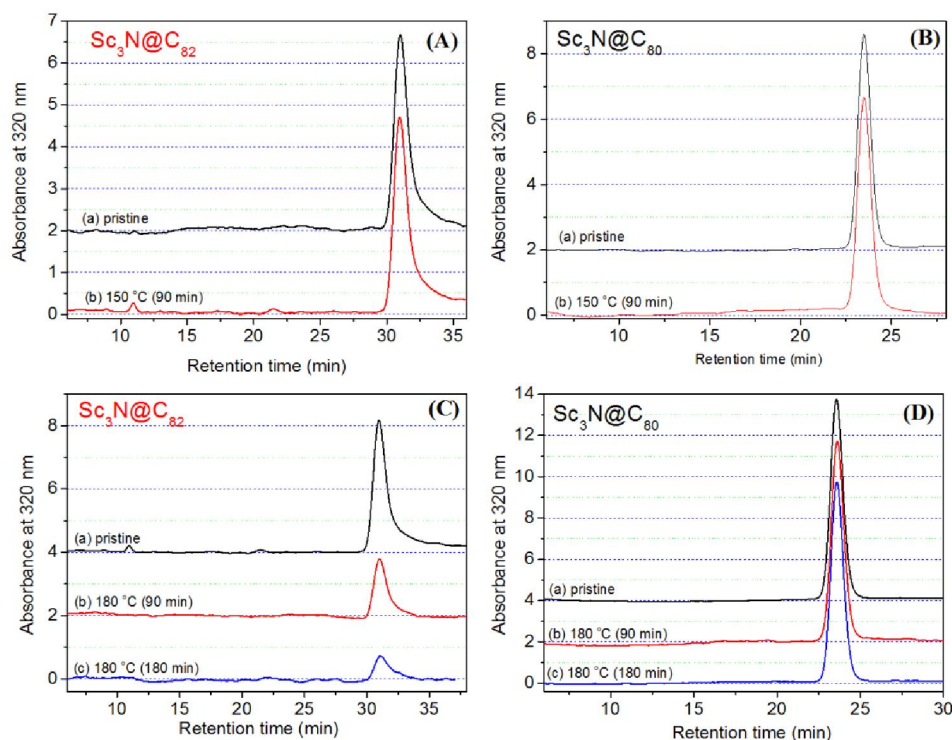

**Figure S5.** HPLC chromatograms of purified  $\text{Sc}_3\text{N}@C_{82}$  (A, C) and  $\text{Sc}_3\text{N}@C_{80-I_h}$  (B, D) solutions in reflux toluene under heating at different temperature in ambient condition. ( $4.6 \times 250$  mm Buckyprep column; flow rate:  $1.6 \text{ mL} \cdot \text{min}^{-1}$ ; injection volume:  $20 \mu\text{L}$ ; toluene as eluent;  $20^\circ\text{C}$ .)

### S6. Cyclic voltammograms of $\text{Sc}_3\text{N}@C_{82}$ in different scanning regions.

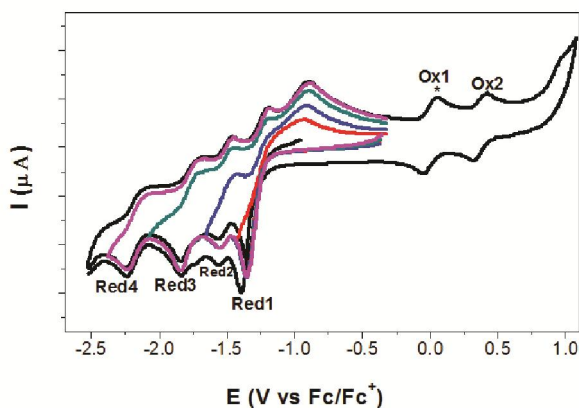

**Figure S6.** Cyclic voltammograms of  $\text{Sc}_3\text{N}@C_{82-C_{2v}}$ (39718) in *o*-DCB solution in different scanning regions showing the correlation of each reduction step with the corresponding re-oxidation step. Scan rate:  $100 \text{ mV} \cdot \text{s}^{-1}$ ,  $\text{TBAPF}_6$  as supporting electrolyte. The asterisk labels the oxidation peak of ferrocene, which coincidentally overlaps with the first oxidation peak of  $\text{Sc}_3\text{N}@C_{82-C_{2v}}$ (39718).

**Table S4.** Redox potentials (V vs Fc/Fc<sup>+</sup>) and electrochemical energy gaps ( $\Delta E_{\text{gap, EC}}$ ) of Sc<sub>3</sub>N@C<sub>82</sub>-C<sub>2v</sub>(39718) and Gd<sub>3</sub>N@C<sub>82</sub>-C<sub>s</sub>(39663).

| Samples                                                    | E <sub>1/2</sub> (V vs Fc/Fc <sup>+</sup> ) |                      |       |        |                                        |        | $\Delta E_{\text{gap, EC}}$ / V <sup>[a]</sup> | Ref.      |
|------------------------------------------------------------|---------------------------------------------|----------------------|-------|--------|----------------------------------------|--------|------------------------------------------------|-----------|
|                                                            | Reduction steps (E <sub>1/2, red</sub> )    |                      |       |        | Oxidation step (E <sub>1/2, ox</sub> ) |        |                                                |           |
|                                                            | first                                       | second               | third | fourth | first                                  | second |                                                |           |
| Sc <sub>3</sub> N@C <sub>82</sub> -C <sub>2v</sub> (39718) | -1.35 <sup>[b]</sup>                        | -1.52                | -1.78 | -2.18  | 0                                      | 0.37   | 1.35                                           | This work |
| Gd <sub>3</sub> N@C <sub>82</sub> -C <sub>s</sub> (39663)  | -1.52 <sup>[b]</sup>                        | -1.86 <sup>[b]</sup> | -     | -      | 0.37                                   | -      | 1.89                                           | S6        |

<sup>[a]</sup>  $\Delta E_{\text{gap, EC}} = E_{1/2, \text{ox}(1)} - E_{1/2, \text{red}(1)}$ ; <sup>[b]</sup> The cathodic peak potential.

#### References:

- S1. Yang, S. F.; Popov, A. A.; Dunsch, L. *Angew. Chem. Int. Ed.* **2007**, *46*, 1256 – 1259.
- S2. Yang, S. F.; Kalbac, M.; Popov, A.; Dunsch, L. *Chem. Eur. J.* **2006**, *12*, 7856 – 7862.
- S3. Olmstead, M. M.; Bettencourt-Dias, A.; Duchamp, J. C.; Stevenson, S.; Marciu, D.; Dorn, H. C.; Balch, A. L. *Angew. Chem. Int. Ed.* **2001**, *40*, 1223 – 1225.
- S4. Yang, S. F.; Popov, A. A.; Kalbac, M.; Dunsch, L. *Chem. Eur. J.* **2008**, *14*, 2084 – 2092.
- S5. Fowler, P.; Manolopoulos, D. E. *An Atlas of Fullerenes*; Clarendon Press: Oxford, U.K., 1995.
- S6. Chaur, M. N.; Athans, A. J.; Echegoyen, L. *Tetrahedron* **2008**, *64*, 11387 – 11393.
